# Supplementary material
Source: Springer Nature journal article supplement (https://www.springermedizin.de/resource/supplementary/12913_2012_2122_MOESM4_ESM.pdf/9529662)

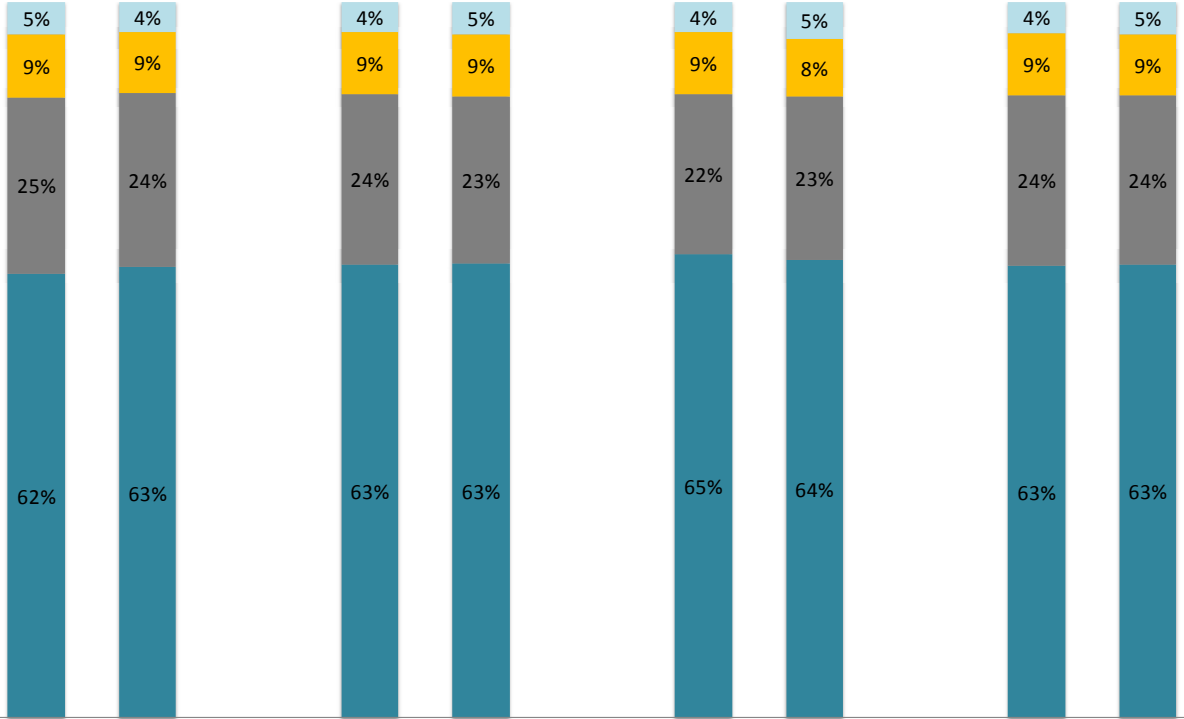

2007-09  
2010  
≤ 34 years

2007-09  
2010  
34 - 39 years

2007-09  
2010  
≥ 40 years

2007-09  
2010  
All ages

1 cycle 2 cycles 3 cycles ≥ 4 cycles

Supplement: MOESM4 [file 9529662]
